# Supplementary material
Source: PubMed Central journal article supplement (PMC3528563)
Supplement: 1212788109_pnas.201212788SI.pdf [file 1212788109_pnas.201212788SI.pdf]

# Supporting Information

MacMillan et al. 10.1073/pnas.1212788109

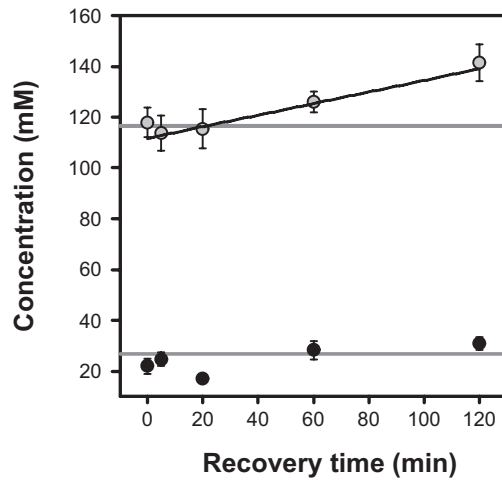

**Fig. S1.** Muscle concentration of  $\text{Na}^+$  (black) and  $\text{K}^+$  (gray) during chill-coma recovery at 22 °C following 24 h at 0 °C. Gray lines indicate mean values of control crickets (those that did not receive any cold exposure). Cold exposure did not significantly affect  $\text{Na}^+$  or  $\text{K}^+$  concentration of the muscle. Solid black line indicates a significant positive relationship between recovery time and  $\text{K}^+$  concentration.

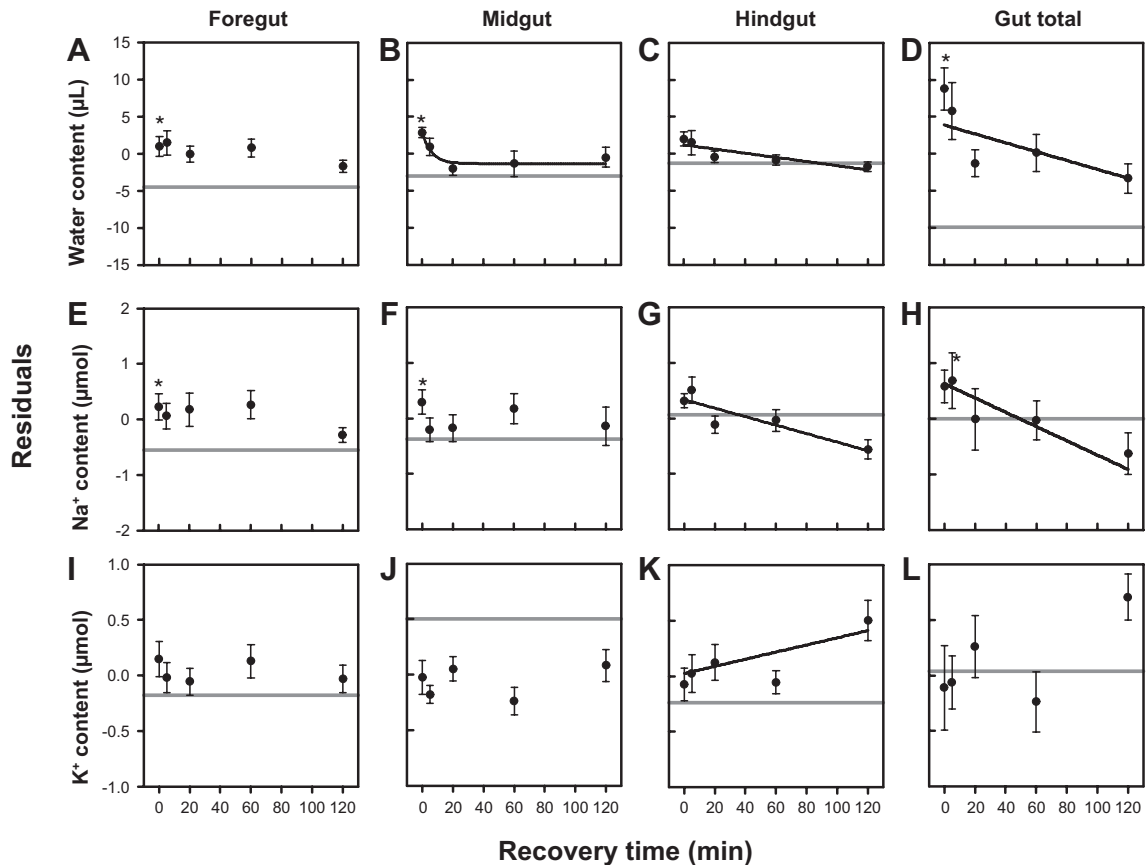

**Fig. S2.** Residual water (A–D),  $\text{Na}^+$  (E–H), and  $\text{K}^+$  (I–L) content of each of the three gut segments and total gut of crickets during chill-coma recovery at 22 °C following 24 h at 0 °C. Solid black lines indicate a significant relationship between recovery time and gut volume or ion content. Gray lines indicate means of control crickets (those that did not receive any cold exposure). Asterisks denote a significant effect of cold exposure on ion concentration or content.

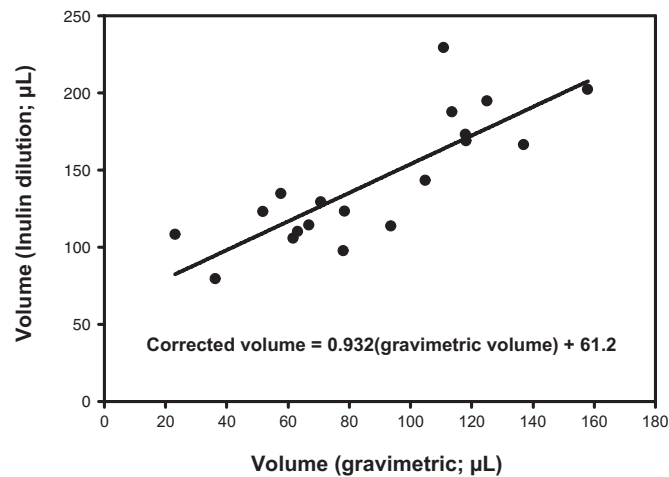

**Fig. S3.** The relationship between gravimetric estimates of hemolymph volume and volume quantified using the inulin dilution method in *G. pennsylvanicus*. Gravimetric estimates of hemolymph volume significantly correlated ( $P_{intercept} < 0.001$ ;  $P_{slope} < 0.001$ ,  $R^2 = 0.66$ ) with estimates obtained on the same individuals using the inulin dilution method. Inulin dilution was completed on 19 crickets at 22 °C to generate correction factors for hemolymph (equation shown) and muscle ( $4.14 \pm 0.66\%$  hemolymph by volume) ion and water content. A 5% solution of FITC inulin in 150 mM NaCl was dialyzed in the dark and at room temperature against 150 mM NaCl (to remove unbound FITC) in benzoylated dialysis tubing with a molecular weight cutoff of 2,000 kDa (Sigma Aldrich) and the resulting (~3% FITC-inulin) solution was used for injection. Crickets were immobilized using plasticine and a small amount of vacuum grease was applied to the injection site to minimize bleeding. A 2- $\mu$ L bolus of the inulin solution was injected at the base of the right wing under the pronotum. Fifteen minutes later the crickets were sampled as above to collect hemolymph and muscle tissue. Muscle tissue from one femur was used to measure water content gravimetrically. The hemolymph and muscle tissue from the other femur were weighed and placed in 20 volumes of 500-mM Hepes buffer (pH 7.4), homogenized using a bullet blender with 1-mm glass beads (Next Advance), and centrifuged at  $7,000 \times g$  for 10 min. Fifty-microliter aliquots of the resulting supernatant were loaded onto black 96-well plates and fluorescence was measured (excitation = 485 nm, emission = 538 nm) in a Spectramax M2e spectrophotometer (Molecular Devices). Sample fluorescence was compared with dilutions of the 3% injection solution in 500-mM Hepes and corrected by comparison with hemolymph and muscle tissue of three control crickets that did not receive an injection.

**Table S1. Results of linear and nonlinear regression of cricket chill-coma recovery time and cold exposure duration**

| Index              | Model              | df        | F              | P                | F (exponent) | P (exponent)     | Log likelihood | AIC          | P.adj.                      | Sig.       |
|--------------------|--------------------|-----------|----------------|------------------|--------------|------------------|----------------|--------------|-----------------------------|------------|
| Abdomen            | Linear             | 38        | 958.9          | <0.001           |              |                  | -83.9          | 175.8        |                             |            |
|                    | <b>Exponential</b> | <b>38</b> | <b>2,603.5</b> | <b>&lt;0.001</b> | <b>67.8</b>  | <b>&lt;0.001</b> | <b>-77.5</b>   | <b>165.0</b> | <b>&lt;0.001, &lt;0.001</b> | <b>***</b> |
| Forelegs           | Linear             | 38        | 363.3          | <0.001           |              |                  | -106.6         | 221.1        |                             |            |
|                    | <b>Exponential</b> | <b>38</b> | <b>6,863.7</b> | <b>&lt;0.001</b> | <b>8.7</b>   | <b>&lt;0.001</b> | <b>-89.2</b>   | <b>188.4</b> | <b>&lt;0.001, &lt;0.001</b> | <b>***</b> |
| Hindlegs           | Linear             | 38        | 155.1          | <0.001           |              |                  | -113.5         | 234.9        |                             |            |
|                    | <b>Exponential</b> | <b>38</b> | <b>5,851.3</b> | <b>&lt;0.001</b> | <b>0.1</b>   | <b>&lt;0.001</b> | <b>-97.3</b>   | <b>204.5</b> | <b>&lt;0.001, 0.001</b>     | <b>***</b> |
| Righting (<24 h)   | Linear             | 38        | 267.7          | <0.001           |              |                  | -151.1         | 310.3        |                             |            |
|                    | <b>Exponential</b> | <b>38</b> | <b>1,675.5</b> | <b>0.002</b>     | <b>3.2</b>   | <b>0.073</b>     | <b>-147.0</b>  | <b>304.1</b> | <b>0.002, 0.073</b>         | <b>**</b>  |
| Activity detection | Linear             | 30        | 306.9          | <0.001           |              |                  | -93.4          | 192.9        |                             |            |
|                    | <b>Exponential</b> | <b>30</b> | <b>814.7</b>   | <b>&lt;0.001</b> | <b>13.2</b>  | <b>0.001</b>     | <b>-82.3</b>   | <b>172.6</b> | <b>&lt;0.001, 0.001</b>     | <b>***</b> |

Four visual indices of chill-coma recovery were recorded: first coordinated contraction of the abdomen, movement of the forelegs, movement of the hind legs, and the ability of a cricket to independently right itself (righting). *F* and *P* values of the exponent parameter are shown separately for exponential models. Models of best fit (boldface) were chosen based on Akaike information criterion (AIC), with an AIC difference of 2 required for selection of the more complex exponential model. Statistical significance (Sig.) was determined on adjusted *P* values (*P*.adj.) following false discovery rate correction (see *Materials and Methods* for details).

**Table S2.** Results of *t* tests of the effects of 24 h of exposure to 0 °C on hemolymph, muscle, and gut ion and water content

| Tissue    | Variable                      | df        | <i>t</i>    | <i>P</i>         | <i>P</i> .adj.   | Sig.       | Dir. |
|-----------|-------------------------------|-----------|-------------|------------------|------------------|------------|------|
| Hemolymph | <b>Volume</b>                 | <b>12</b> | <b>6.55</b> | <b>&lt;0.001</b> | <b>0.001</b>     | <b>**</b>  | –    |
|           | <b>Na<sup>+</sup> (μmol)</b>  | <b>18</b> | <b>4.65</b> | <b>&lt;0.001</b> | <b>0.001</b>     | <b>**</b>  | –    |
|           | K <sup>+</sup> (μmol)         | 18        | 1.01        | 0.322            | 0.322            |            |      |
|           | <b>[Na<sup>+</sup>]</b>       | <b>14</b> | <b>3.10</b> | <b>&lt;0.001</b> | <b>0.017</b>     | <b>*</b>   | –    |
|           | <b>[K<sup>+</sup>]</b>        | <b>10</b> | <b>2.80</b> | <b>0.019</b>     | <b>0.024</b>     | <b>*</b>   | +    |
| Muscle    | Water content                 | 17        | 0.16        | 0.873            | 0.873            |            |      |
|           | [Na <sup>+</sup> ]            | 18        | 1.12        | 0.277            | 0.582            |            |      |
|           | [K <sup>+</sup> ]             | 15        | 0.19        | 0.844            | 0.873            |            |      |
|           | Ena                           | 17        | 0.96        | 0.349            | 0.582            |            |      |
|           | <b>Ek</b>                     | <b>13</b> | <b>3.37</b> | <b>0.005</b>     | <b>0.025</b>     | <b>*</b>   | +    |
| Foregut   | <b>Water content</b>          | <b>18</b> | <b>3.04</b> | <b>0.007</b>     | <b>0.021</b>     | <b>*</b>   | +    |
|           | <b>Na<sup>+</sup> content</b> | <b>17</b> | <b>2.71</b> | <b>0.017</b>     | <b>0.025</b>     | <b>*</b>   | +    |
|           | K <sup>+</sup> content        | 18        | 1.39        | 0.182            | 0.182            |            |      |
| Midgut    | <b>Water content</b>          | <b>16</b> | <b>5.53</b> | <b>&lt;0.001</b> | <b>&lt;0.001</b> | <b>***</b> | +    |
|           | <b>Na<sup>+</sup> content</b> | <b>17</b> | <b>2.37</b> | <b>0.030</b>     | <b>0.045</b>     | <b>*</b>   | +    |
|           | K <sup>+</sup> content        | 15        | 2.03        | 0.061            | 0.061            |            |      |
| Hindgut   | Water content                 | 17        | 2.52        | 0.022            | 0.066            |            |      |
|           | Na <sup>+</sup> content       | 15        | 1.51        | 0.151            | 0.227            |            |      |
|           | K <sup>+</sup> content        | 17        | 0.70        | 0.488            | 0.488            |            |      |
| Gut total | <b>Water content</b>          | <b>17</b> | <b>4.29</b> | <b>&lt;0.001</b> | <b>0.002</b>     | <b>**</b>  | +    |
|           | <b>Na<sup>+</sup> content</b> | <b>14</b> | <b>3.33</b> | <b>0.005</b>     | <b>0.008</b>     | <b>**</b>  | +    |
|           | K <sup>+</sup> content        | 17        | 0.30        | 0.772            | 0.772            |            |      |

Statistical significance (Sig.) (boldface) was determined on adjusted *P* values (*P*.adj.) following false discovery rate correction (see *Materials and Methods* for details). Dir, direction of change.

**Table S3. Results of linear and nonlinear (NL) models of *G. pennsylvanicus* hemolymph, muscle, and gut ion and water content during chill-coma recovery following 24 h at 0 °C**

| Tissue    | Variable                 | Model         | df        | <i>F</i>           | <i>P</i>                | LL            | AIC          | <i>P</i> .adj.      | Sig.       | Dir.     |
|-----------|--------------------------|---------------|-----------|--------------------|-------------------------|---------------|--------------|---------------------|------------|----------|
| Hemolymph | Volume                   | <b>Linear</b> | <b>44</b> | <b>1,629.3</b>     | <b>&lt;0.001</b>        | <b>-141.6</b> | <b>291.2</b> | <b>&lt;0.001</b>    | <b>***</b> | <b>+</b> |
|           |                          | NL            | 44        | 4,004.2, 354.1     | 0.590, 0.658            | -141.0        | 292.1        |                     |            |          |
|           | Na <sup>+</sup> content  | <b>Linear</b> | <b>42</b> | <b>644.6</b>       | <b>&lt;0.001</b>        | <b>-86.7</b>  | <b>181.5</b> | <b>&lt;0.001</b>    | <b>***</b> | <b>+</b> |
|           |                          | NL            | 42        | 900.5, 91.7        | 0.652, 0.729            | -86.7         | 183.5        |                     |            |          |
|           | K <sup>+</sup> content   | Linear        | 39        | 117.7              | 0.602                   | -47.9         | 103.8        | 0.602               |            |          |
|           |                          | NL            | 39        | 81.0, 32.5         | 0.347, 0.755            | -49.2         | 108.4        |                     |            |          |
|           | [Na <sup>+</sup> ]       | Linear        | 34        | 1,309.1            | 0.513                   | -152.2        | 312.4        | 0.602               |            |          |
|           |                          | NL            | N/A       | N/A                | N/A                     | N/A           | N/A          | N/A                 |            |          |
|           | [K <sup>+</sup> ]        | Linear        | 34        | 161.3              | <0.001                  | -116.0        | 239.9        |                     |            |          |
|           |                          | <b>NL</b>     | <b>34</b> | <b>87.4, 41.3</b>  | <b>0.004, 0.158</b>     | <b>-111.0</b> | <b>232.1</b> | <b>0.008, 0.237</b> | <b>**</b>  | <b>-</b> |
| Muscle    | H <sub>2</sub> O content | Linear        | 47        | 1.33               | 0.255                   | -52.8         | 113.5        | 0.306               |            |          |
|           |                          | NL            | 47        | 0.2, 1.4           | 0.651, 0.241            | -53.2         | 116.4        |                     |            |          |
|           | [Na <sup>+</sup> ]       | <b>Linear</b> | <b>43</b> | <b>224.2</b>       | <b>0.011</b>            | <b>-147.8</b> | <b>303.6</b> | <b>0.022</b>        | <b>*</b>   | <b>+</b> |
|           |                          | NL            | 43        | 88.9, 40.6         | 0.997, 0.999            | -151.8        | 313.7        |                     |            |          |
|           | [K <sup>+</sup> ]        | <b>Linear</b> | <b>43</b> | <b>815.1</b>       | <b>0.002</b>            | <b>-183.0</b> | <b>374.0</b> | <b>0.006</b>        | <b>**</b>  | <b>+</b> |
|           |                          | NL            | 43        | 1,875.7, 2.2       | 0.903, 0.886            | -183.0        | 375.9        |                     |            |          |
|           | E <sub>Na</sub>          | Linear        | 42        | 167.7              | 0.812                   | -170.6        | 349.2        | 0.812               |            |          |
|           |                          | NL            | 42        | 85.9, 88.7         | 0.994, 0.974            | -170.3        | 350.7        |                     |            |          |
|           | E <sub>k</sub>           | Linear        | 43        | 546.7              | <0.001                  | -164.6        | 347.1        |                     |            |          |
|           |                          | <b>NL</b>     | <b>43</b> | <b>760.0, 56.9</b> | <b>&lt;0.001, 0.201</b> | <b>-163.3</b> | <b>336.6</b> | <b>0.001, 0.301</b> | <b>**</b>  | <b>-</b> |
| Foregut   | H <sub>2</sub> O content | Linear        | 47        | 0.6                | 0.115                   | -128.0        | 264.0        | 0.345               |            |          |
|           |                          | NL            | 47        | 0.1, 5.2           | 0.711, 0.023            | -128.1        | 266.2        |                     |            |          |
|           | Na <sup>+</sup> content  | Linear        | 47        | 0.5                | 0.500                   | -51.9         | 111.8        | 0.750               |            |          |
|           |                          | NL            | 47        | 0.1, 0.1           | 0.742, 0.721            | -52.3         | 114.7        |                     |            |          |
|           | K <sup>+</sup> content   | Linear        | 47        | 0.1                | 0.887                   | -26.7         | 61.4         | 0.887               |            |          |
|           |                          | NL            | 47        | 0.1, 0.1           | 0.724, 0.963            | -26.9         | 63.7         |                     |            |          |
| Midgut    | H <sub>2</sub> O content | Linear        | 43        | 0.7                | 0.143                   | -115.5        | 239.0        |                     |            |          |
|           |                          | <b>NL</b>     | <b>43</b> | <b>8.5, 4.4</b>    | <b>0.001, 0.302</b>     | <b>-111.7</b> | <b>233.3</b> | <b>0.005, 0.378</b> | <b>**</b>  | <b>-</b> |
|           | Na <sup>+</sup> Content  | Linear        | 42        | 1.0                | 0.0532                  | -43.6         | 95.3         | 0.075, 0.297        |            |          |
|           |                          | NL            | 42        | 2.4, 1.9           | 0.030, 0.178            | -41.2         | 92.3         | 0.478               |            |          |
|           | K <sup>+</sup> Content   | Linear        | 40        | 0.1                | 0.478                   | -13.8         | 35.7         | 0.478               |            |          |
|           |                          | NL            | 40        | 0.1, 0.1           | 0.911, 0.994            | -14.2         | 38.4         |                     |            |          |
| Hindgut   | H <sub>2</sub> O content | <b>Linear</b> | <b>45</b> | <b>3.4</b>         | <b>0.010</b>            | <b>-112.3</b> | <b>232.6</b> | <b>0.010</b>        | <b>*</b>   | <b>-</b> |
|           |                          | NL            | 45        | 1.2, 7.8           | 0.005, 0.294            | -111.0        | 232.2        |                     |            |          |
|           | Na <sup>+</sup> content  | <b>Linear</b> | <b>43</b> | <b>8.1</b>         | <b>&lt;0.001</b>        | <b>-37.4</b>  | <b>82.8</b>  | <b>0.001</b>        | <b>**</b>  | <b>-</b> |
|           |                          | NL            | 43        | 0.2, 41.0          | 0.654, <0.001           | -37.3         | 84.5         |                     |            |          |
|           | K <sup>+</sup> content   | <b>Linear</b> | <b>42</b> | <b>9.3</b>         | <b>0.004</b>            | <b>-25.9</b>  | <b>59.8</b>  | <b>0.012</b>        | <b>*</b>   | <b>+</b> |
|           |                          | NL            | 42        | 253.6, 0.2         | <0.001, 0.683           | -25.6         | 61.3         |                     |            |          |
| Gut total | H <sub>2</sub> O content | <b>Linear</b> | <b>43</b> | <b>0.8</b>         | <b>0.018</b>            | <b>-144.0</b> | <b>296.0</b> | <b>0.027</b>        | <b>*</b>   | <b>-</b> |
|           |                          | NL            | 43        | 5.1, 4.0           | 0.005, 0.267            | -142.2        | 294.4        |                     |            |          |
|           | Na <sup>+</sup> Content  | <b>Linear</b> | <b>42</b> | <b>3.1</b>         | <b>0.007</b>            | <b>-70.4</b>  | <b>148.8</b> | <b>0.022</b>        | <b>*</b>   | <b>-</b> |
|           |                          | NL            | 42        | 0.1, 29.7          | 0.603, <0.001           | -69.9         | 149.8        |                     |            |          |
|           | K <sup>+</sup> Content   | Linear        | 40        | 3.85               | 0.192                   | -48.8         | 105.6        | 0.192               |            |          |
|           |                          | NL            | 40        | 43.4, 0.3          | <0.001, 0.996           | -49.3         | 108.6        |                     |            |          |

Models of best fit (boldface) were chosen based on Akaike information criterion (AIC), with an AIC difference of 2 required for selection of the more complex exponential model. Variables that could not be effectively fit to a given model are marked (N/A) and are considered nonsignificant. *F* and *P* values of the exponent parameter are shown separately for exponential models. Statistical significance (Sig.) was determined on adjusted *P* values (*P*.adj.) following false discovery rate correction. Dir., direction of change; LL, log likelihood ratio.

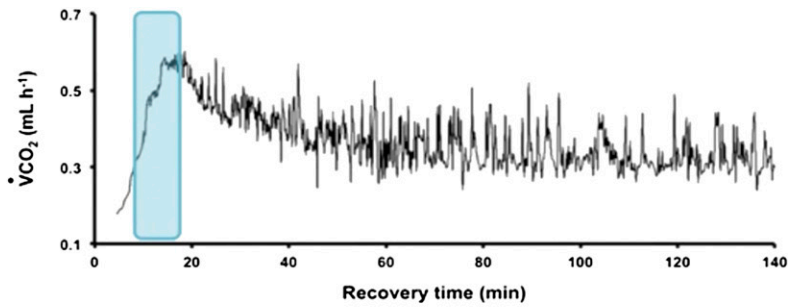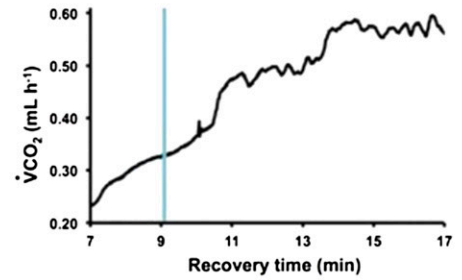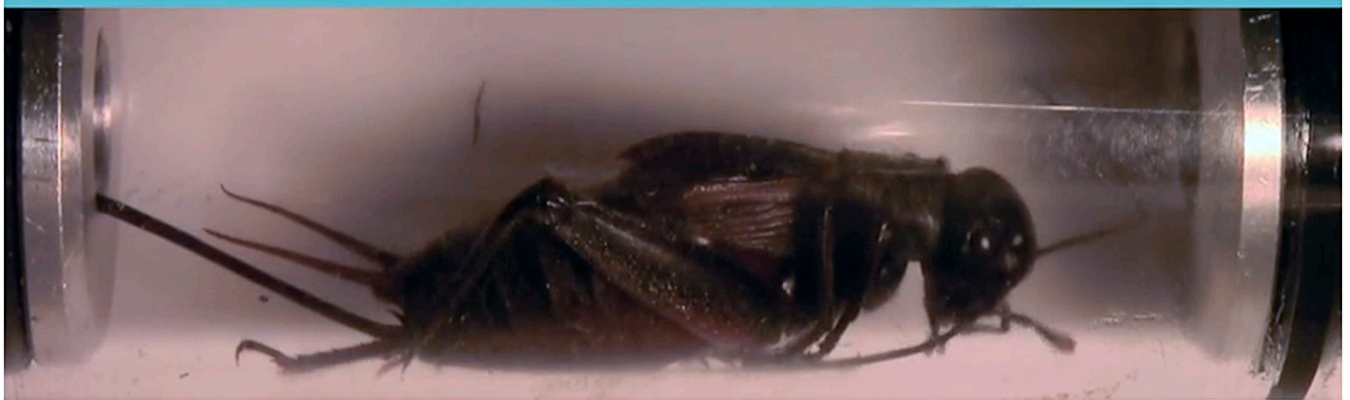

**Movie S1.** Example video recording of a cricket (8× speed) inside the respirometry chamber with accompanying  $\dot{V}CO_2$  trace (*Upper Left*) during chill-coma recovery at 22 °C following 16 h at 0 °C. The activity detector was removed to enable video recording. Three 10-min periods are shown in sequence, with the time-matched  $\dot{V}CO_2$  trace shown in detail (*Upper Right*). As metabolic rate peaks early in the overshoot, there is minimal movement of the cricket inside the chamber, demonstrating that the overshoot is not simply a product of cricket activity during recovery. Later in the overshoot, the cricket has a high and variable  $\dot{V}CO_2$  that was often associated with high apparent activity in crickets measured using the activity detector. From this video it is clear that this activity is modest, and in the form of abdominal contractions that may serve to supply oxygen and expel  $CO_2$  more effectively during a period of high metabolic demand and/or actively mix the hemolymph, the composition of which is changing. After the overshoot is complete, true periods of high activity (such as attempts by the cricket to turn around in the chamber) cause deviations in  $\dot{V}CO_2$  that are small and fleeting relative to the overshoot.

[Movie S1](#)
